# Supplementary material for: Long-Term Usage of Proton Pump Inhibitors Associated with Prognosis in Patients with Colorectal Cancer
Source: MDPI journal article supplement (doi:10.3390/cancers15215304), 2023-11-06
Supplement: s1 [file s1]

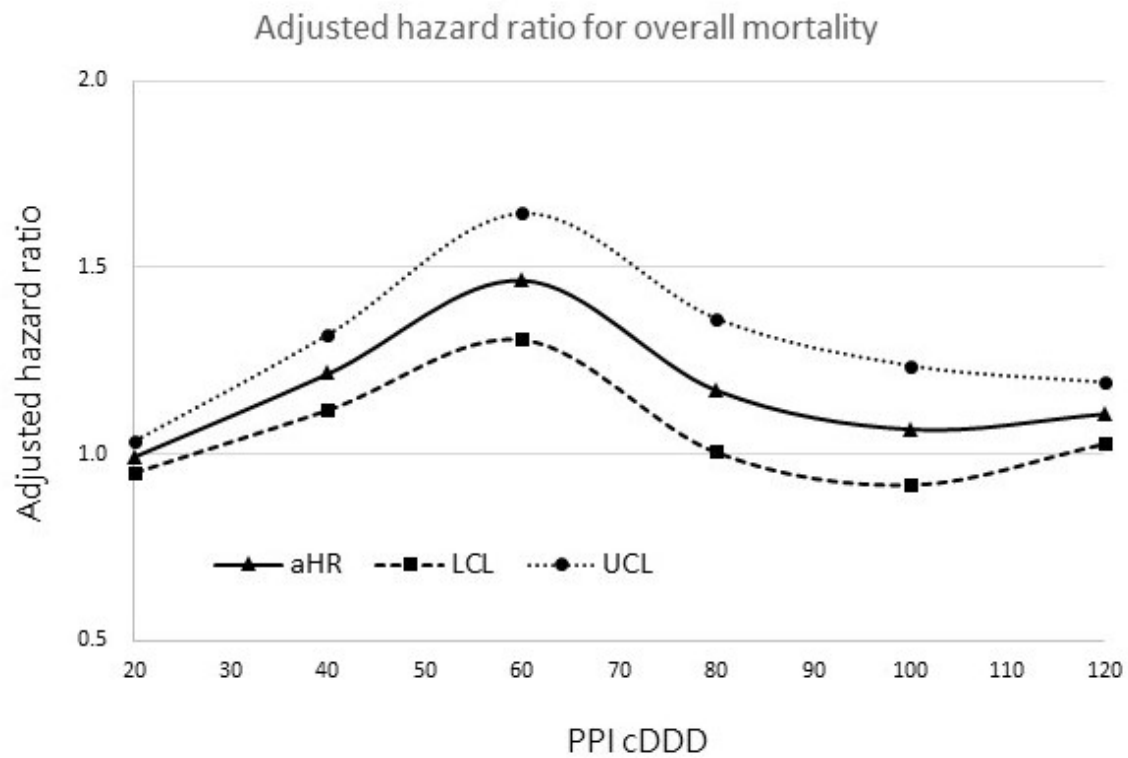

**Figure S1:** The Dose-Response of Proton Pump Inhibitors in Overall Mortality.

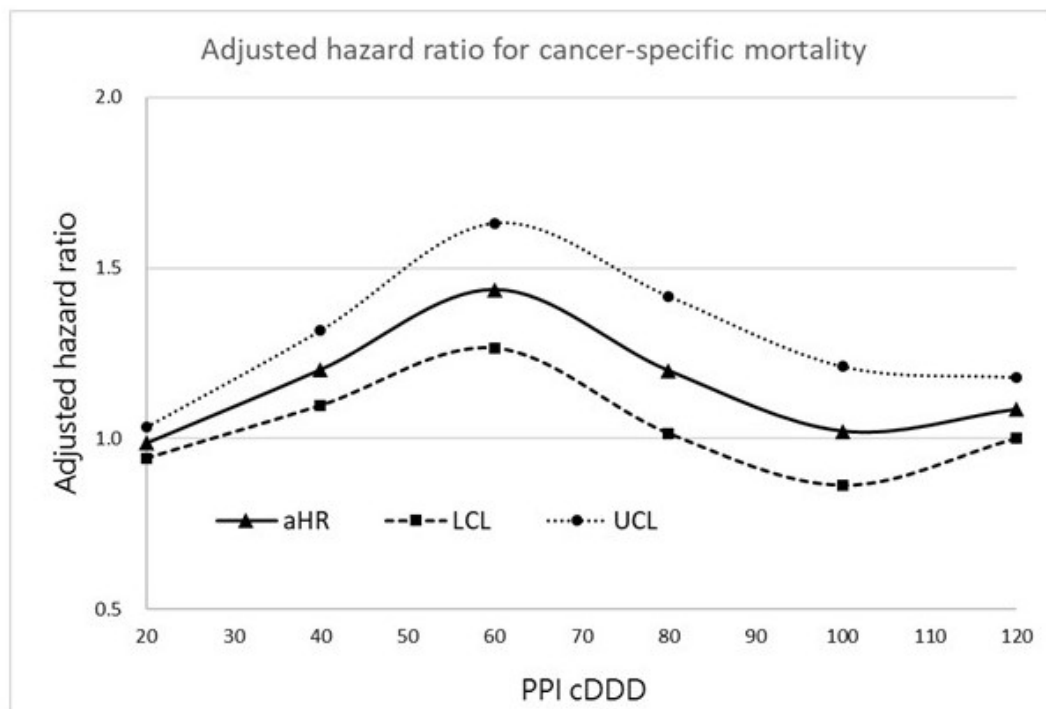

**Figure S2:** The Dose-Response of Proton Pump Inhibitors in Cancer-Specific Mortality.

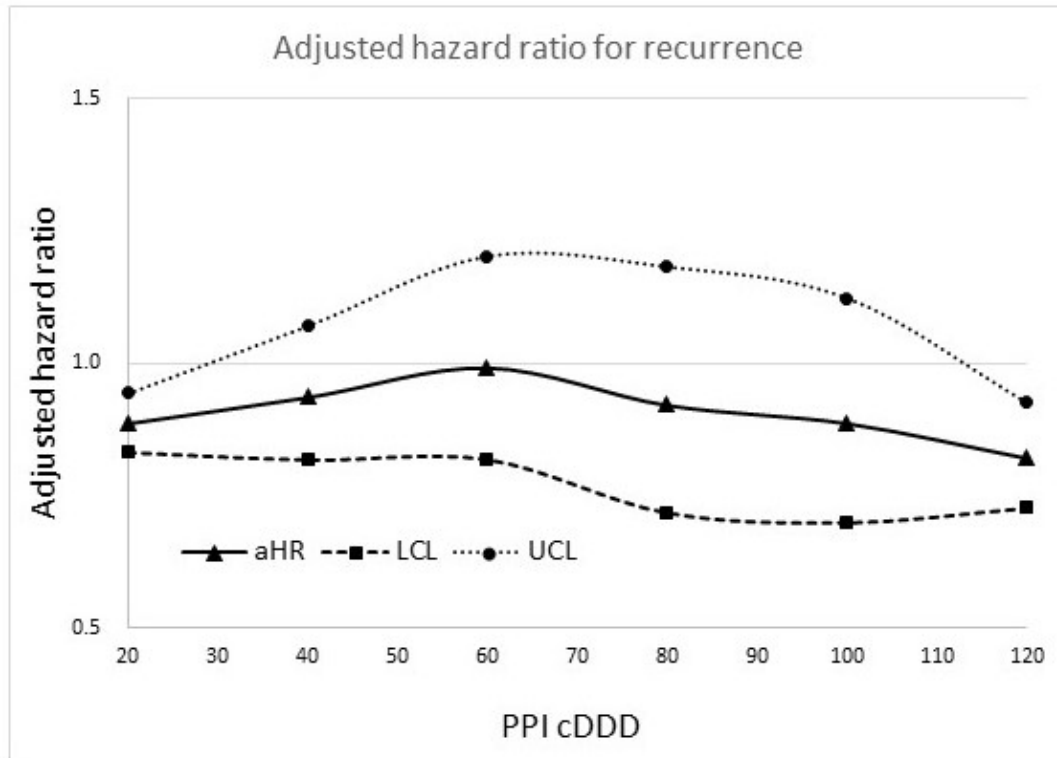

**Figure S3:** The Dose-Response of Proton Pump Inhibitors in Cancer Recurrence.

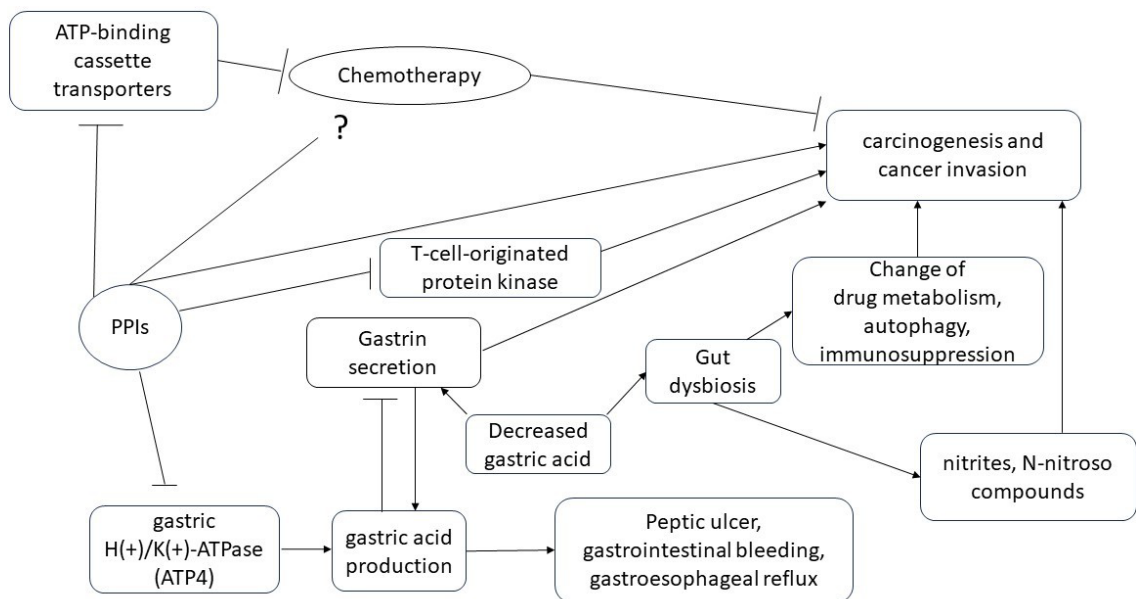

**Figure S4:** Schematic Representation of PPI Effects in Colorectal Cancer.
